# Supplementary figures and images for: Structural properties and antioxidation activities of lignins isolated from sequential two-step formosolv fractionation
Source: Royal Society of Chemistry journal article supplement (doi:10.1039/d2ra02085h), 2022-01-01

### Supporting information

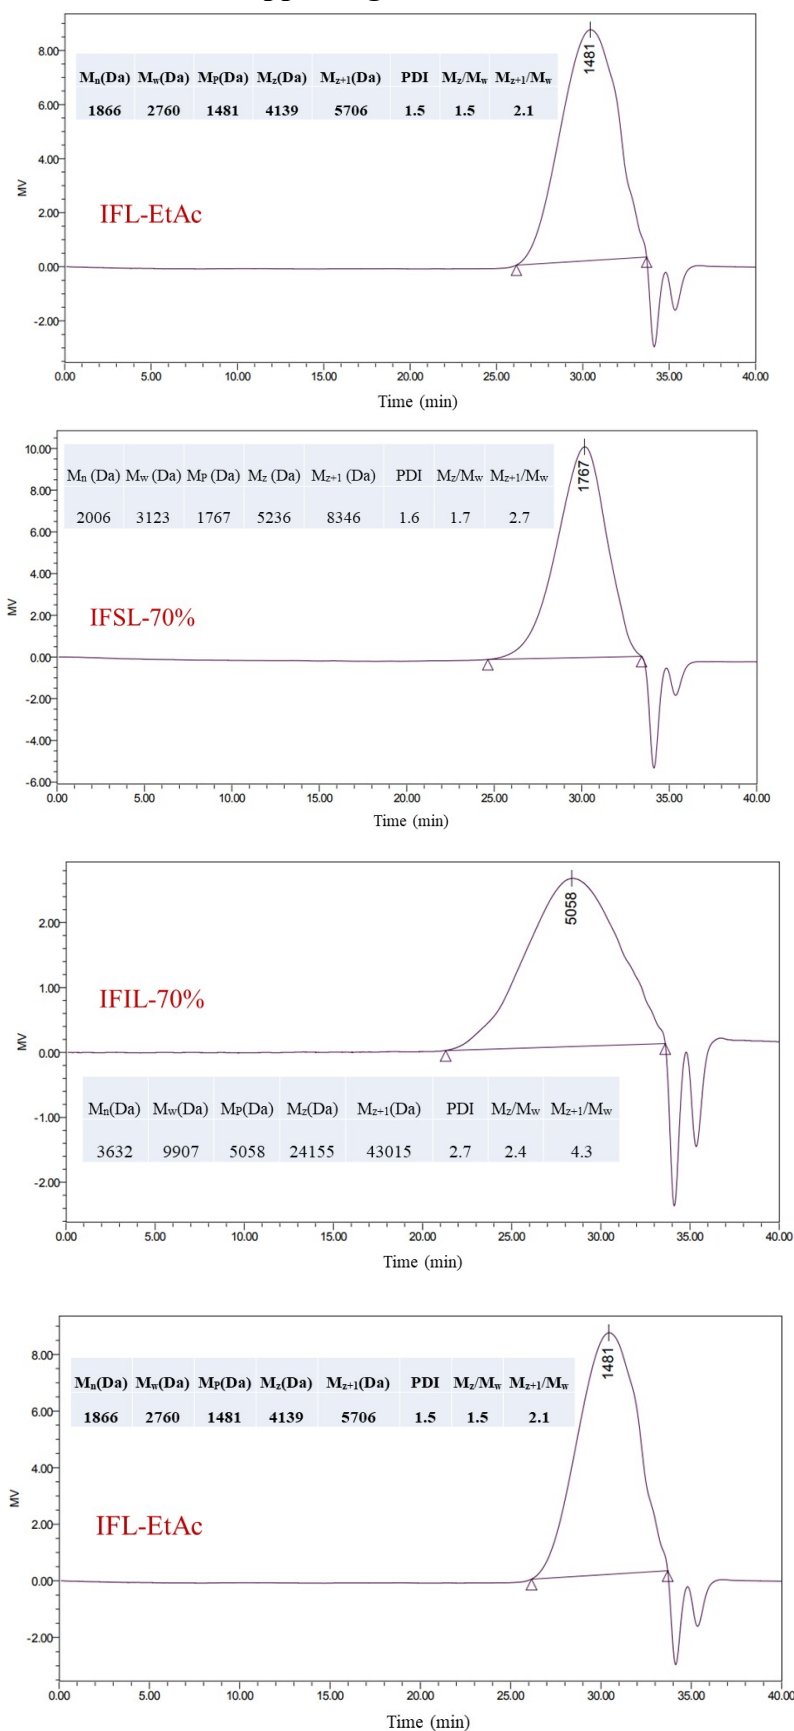

Figure S1. The traces of GPC analyses of isolated lignin fractions.

Supplement: d2ra02085h1.pdf [file d2ra02085h1.pdf]
